# Supplementary material for: Deformation of Gels with Spherical Auxetic Inclusions
Source: MDPI journal article supplement (doi:10.3390/gels8110698), 2022-10-29
Supplement: s1 [file s1]

## Article: Deformation of the materials with spherical auxetic inclusions

### Supplementary 3: Analogy to other metamaterials

Jan Zidek<sup>a\*</sup>, Petr Polacek, Josef Jancar<sup>a</sup>

<sup>a</sup>CEITEC, Brno University of Technology, Purkynova 123, Brno, Czech Republic

\*corresponding author: jancar@fch.vutbr.cz

The space inside particle can be “invisible” for mechanical wave. The analogy of auxetic materials is an invisible cloak from metamaterials. It was theoretically described by Pendry [1]. Real invisibility cloak was proposed by Ni, Zhang et al [2].

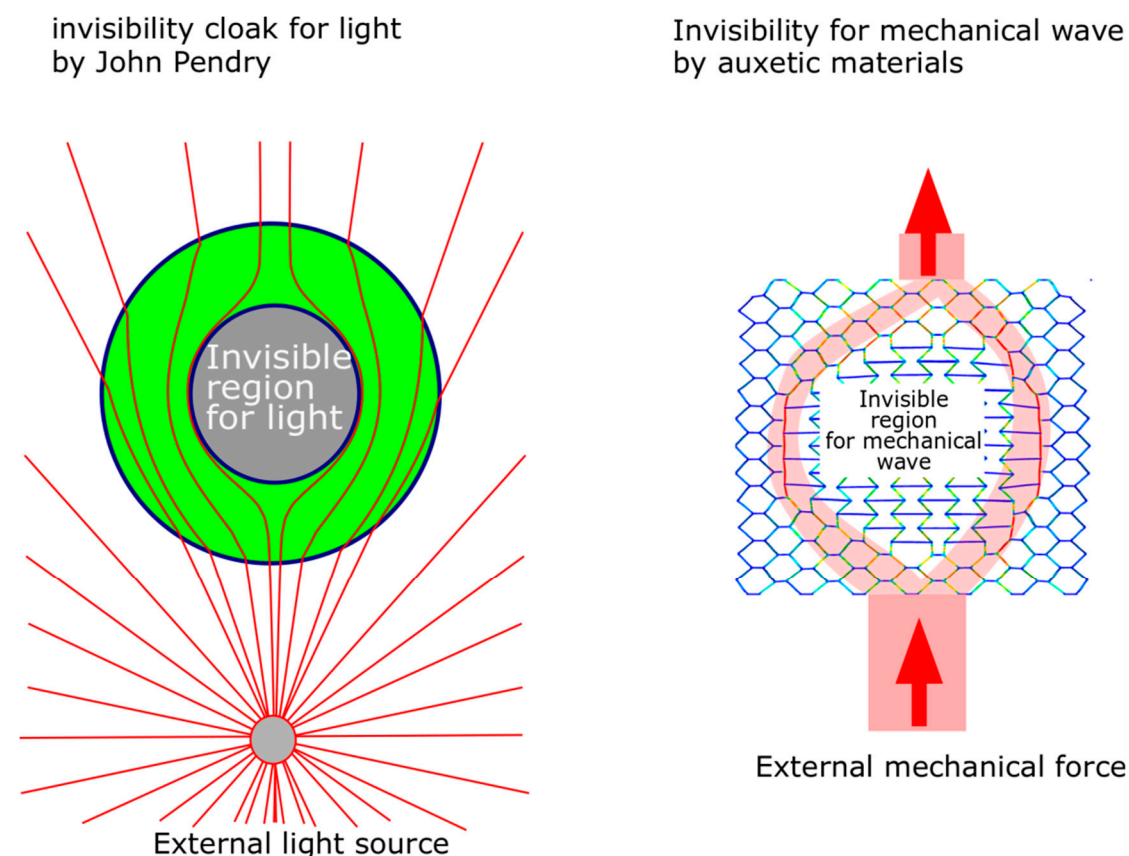

#### References

- [1] Pendry, J. B., Schurig, D., Smith, D. R. (2006). Controlling Electromagnetic Fields. *Science*, 312(5781), 1780-1782. <https://doi.org/10.1126/science.1125907>.
- [2] Ni, X., Wong, Z. J., Mrejen, M., Wang, Y., Zhang, X. (2015). An ultrathin invisibility skin cloak for visible light. *Science*, 349(6254), 1310-1314. <https://doi.org/10.1126/science.aac9411>.
